# Supplementary material for: Contribution of the Tyrosinase (MoTyr) to Melanin Synthesis, Conidiogenesis, Appressorium Development, and Pathogenicity in Magnaporthe oryzae
Source: J Fungi (Basel). 2023 Feb 28;9(3):311. doi: 10.3390/jof9030311 (PMC10059870; doi:10.3390/jof9030311)
Supplement: Supplementary file 1 [file jof-09-00311-s001.zip]

Archive with 6 entries (6 files):
- Supplement Figure S1.tif
- Supplement Figure S2.tif
- Supplement Figure S3.tif
- Supplement Figure S4.tif
- Supplementary figures  legends.pdf
- Supplementary Table S1.xlsx
