# Supplementary material for: Contribution of the Tyrosinase (MoTyr) to Melanin Synthesis, Conidiogenesis, Appressorium Development, and Pathogenicity in Magnaporthe oryzae
Source: J Fungi (Basel). 2023 Feb 28;9(3):311. doi: 10.3390/jof9030311 (PMC10059870; doi:10.3390/jof9030311)
Supplement: Supplementary file 1 [file jof-09-00311-s001.zip › Supplementary Table S1.xlsx]

## Sheet: Sheet1
Primers used in this study
Knockout
MoTyr-A-F	TACATAGCCTACCTCACAAATCC
MoTyr-A-R	GGCACCGTCAACCAACAA
MoTyr-B-F	TGCGGATGAGGATAACGG
MoTyr-B-R	GGCTACAAGTGGGTTGAAGAA
MoTyr-ORF-F	TCATCGTGACGGGTAGGC
MoTyr-ORF-R	GTTGGTCTGGTGGTTAGGC
MoTyr-UAH-F	GACTGCGGGATGGGATTA
MoTyr-UAH-R	GTTGGCGACCTCGTATTGG
YG-F	GATGTAGGAGGGCGTGGATATGTCCT
HY-R	GTATTGACCGATTCCTTGCGGTCCGAA
q-PCR
q-Actin-F	ACAACAACATTGTCATGTCTGGTG
q-Actin-R	CTCGTCGTACTCCTGCTTCG
q-MoTyr-F	GAGCGACGAGCAATCATACT
q-MoTyr-R	CCGTGAGGACAGAAACCC
